# Supplementary material for: 23Na MRI: inter-reader reproducibility of normal fibroglandular sodium concentration measurements at 3 T
Source: PubMed Central journal article supplement (PMC11162986; doi:10.1186/s41747-024-00465-x), 2024-06-10
Supplement: 41747_2024_465_MOESM1_ESM.pdf [file 41747_2024_465_MOESM1_ESM.pdf]

23Na MRI: Inter-reader reproducibility of Normal Fibroglandular Sodium Concentration Measurements at 3 T  
ELECTRONIC SUPPLEMENTARY MATERIAL

Supplementary Table 1. The effect of phantom stratification. B1-corrected mean, minimum and maximum total sodium concentrations (TSCs) and mean fluid-attenuated sodium concentration (FASC) of healthy volunteers' fibroglandular tissue on a breast level. The results are shown for the readers' large and small regions of interest (ROIs). P-value denotes the statistical difference between the non-B1-corrected and B1-corrected measurements.

|            |          | Mean TSC                             |                                                      |         | Minimum TSC                          |                                                      |         | Maximum TSC                          |                                                      |         | Mean FASC                            |                                                      |         |
|------------|----------|--------------------------------------|------------------------------------------------------|---------|--------------------------------------|------------------------------------------------------|---------|--------------------------------------|------------------------------------------------------|---------|--------------------------------------|------------------------------------------------------|---------|
| ROI method | Reader   | With phantom stratification (mmol/L) | Without phantom stratification (mmol/L) <sup>a</sup> | p-value | With phantom stratification (mmol/L) | Without phantom stratification (mmol/L) <sup>a</sup> | p-value | With phantom stratification (mmol/L) | Without phantom stratification (mmol/L) <sup>a</sup> | p-value | With phantom stratification (mmol/L) | Without phantom stratification (mmol/L) <sup>a</sup> | p-value |
| Large ROI  | Reader 1 | 55.7 ± 16.3                          | NA                                                   | NA      | 20.4 ± 6.1                           | NA                                                   | NA      | 82.5 ± 22.7                          | NA                                                   | NA      | 17.2 ± 6.6                           | NA                                                   | NA      |
|            | Reader 2 | 60.4 ± 17.2                          | 53.1 ± 16.0                                          | 0.014   | 30.3 ± 8.5                           | 26.7 ± 8.6                                           | 0.017   | 82.4 ± 22.4                          | 72.6 ± 21.4                                          | 0.016   | 18.9 ± 7.3                           | 16.0 ± 6.9                                           | 0.01    |
| Small ROI  | Reader 1 | 75.4 ± 21.9                          | NA                                                   | NA      | 68.4 ± 22.2                          | NA                                                   | NA      | 81.5 ± 22.1                          | NA                                                   | NA      | 25.2 ± 10.7                          | NA                                                   | NA      |
|            | Reader 2 | 76.5 ± 20.6                          | 67.5 ± 19.7                                          | 0.028   | 70.9 ± 20.2                          | 62.6 ± 18.7                                          | 0.017   | 81.0 ± 21.3                          | 71.4 ± 20.6                                          | 0.016   | 25.1 ± 10.2                          | 21.4 ± 10.2                                          | 0.008   |

<sup>a</sup> The phantom's signal intensity and B1 measurement measured by Reader 1 was used to minimise the effect of differences caused by phantom ROI placement that contributes to B1-corrected measurements.  
NA not applicable.

Supplementary Table 2. Mean, minimum and maximum total sodium concentrations of healthy volunteers' fibroglandular tissue with and without B1 corrections on a breast level. The results are shown for the readers' large and small regions of interest (ROIs). P-value denotes the statistical difference between the non-B1-corrected and B1-corrected measurements.

|            |          | Mean                      |                                    |         | Minimum                   |                                    |         | Maximum                   |                                    |         |
|------------|----------|---------------------------|------------------------------------|---------|---------------------------|------------------------------------|---------|---------------------------|------------------------------------|---------|
| ROI method | Reader   | Non-B1-corrected (mmol/L) | B1-corrected <sup>a</sup> (mmol/L) | p-value | Non-B1-corrected (mmol/L) | B1-corrected <sup>a</sup> (mmol/L) | p-value | Non-B1-corrected (mmol/L) | B1-corrected <sup>a</sup> (mmol/L) | p-value |
| Large ROI  | Reader 1 | 96.5 ± 30.5               | 55.7 ± 16.3                        | < 0.001 | 34.4 ± 7.9                | 20.4 ± 6.1                         | < 0.001 | 144.4 ± 46.6              | 82.5 ± 22.7                        | < 0.001 |
|            | Reader 2 | 105.4 ± 33.8              | 60.4 ± 17.2                        | < 0.001 | 54.1 ± 19.5               | 30.3 ± 8.5                         | < 0.001 | 143.2 ± 42.3              | 82.4 ± 22.4                        | < 0.001 |
| Small ROI  | Reader 1 | 132.2 ± 44.7              | 75.4 ± 21.9                        | < 0.001 | 120.2 ± 45.2              | 68.4 ± 22.2                        | < 0.001 | 142.5 ± 45.3              | 81.5 ± 22.1                        | < 0.001 |
|            | Reader 2 | 133.3 ± 40.3              | 76.5 ± 20.6                        | < 0.001 | 123.9 ± 40.3              | 70.9 ± 20.2                        | < 0.001 | 140.9 ± 41.2              | 81.0 ± 21.3                        | < 0.001 |

<sup>a</sup> The phantom's signal intensity and B1 measurement measured by Reader 1 was used to minimise the effect of differences caused by phantom ROI placement that contributes to B1-corrected measurements.
